# Supplementary material for: Near surface structure of the North Anatolian Fault Zone fromRayleigh and Love wave tomography using ambient seismic noise
Source: Copernicus journal article supplement (doi:10.5194/se-2018-100), 2018-10-09
Supplement: Supplementary file 1 [file se-2018-100-supplement.zip]

Archive with 2 entries (2 files):
- s_wave_velocity_model.txt
- supplementary_material.pdf
