# Supplementary material for: Near surface structure of the North Anatolian Fault Zone fromRayleigh and Love wave tomography using ambient seismic noise
Source: Copernicus journal article supplement (doi:10.5194/se-2018-100), 2018-10-09
Supplement: Supplementary file 1 [file se-2018-100-supplement.zip › s_wave_velocity_model.txt]

30.07 40.32 0.0 1.5866
30.07 40.32 0.9 2.4525
30.07 40.32 1.8 2.8495
30.07 40.32 2.7 2.9648
30.07 40.32 3.6 3.0408
30.07 40.32 4.5 3.1477
30.07 40.32 5.4 3.2556
30.07 40.32 6.3 3.3846
30.07 40.32 7.2 3.5245
30.07 40.32 8.1 3.5852
30.07 40.37 0.0 1.5336
30.07 40.37 0.9 2.582
30.07 40.37 1.8 2.8537
30.07 40.37 2.7 2.9356
30.07 40.37 3.6 2.9889
30.07 40.37 4.5 3.124
30.07 40.37 5.4 3.3204
30.07 40.37 6.3 3.4478
30.07 40.37 7.2 3.5364
30.07 40.37 8.1 3.5958
30.07 40.43 0.0 1.731
30.07 40.43 0.9 2.5142
30.07 40.43 1.8 2.8281
30.07 40.43 2.7 3.0594
30.07 40.43 3.6 3.2203
30.07 40.43 4.5 3.3314
30.07 40.43 5.4 3.3929
30.07 40.43 6.3 3.4553
30.07 40.43 7.2 3.5082
30.07 40.43 8.1 3.5119
30.07 40.49 0.0 1.8438
30.07 40.49 0.9 2.4251
30.07 40.49 1.8 2.8257
30.07 40.49 2.7 3.1716
30.07 40.49 3.6 3.2859
30.07 40.49 4.5 3.3396
30.07 40.49 5.4 3.3636
30.07 40.49 6.3 3.4083
30.07 40.49 7.2 3.4436
30.07 40.49 8.1 3.4597
30.07 40.54 0.0 1.5495
30.07 40.54 0.9 2.6848
30.07 40.54 1.8 2.8841
30.07 40.54 2.7 3.0239
30.07 40.54 3.6 3.1254
30.07 40.54 4.5 3.268
30.07 40.54 5.4 3.4218
30.07 40.54 6.3 3.5165
30.07 40.54 7.2 3.572
30.07 40.54 8.1 3.5685
30.07 40.60 0.0 1.5612
30.07 40.60 0.9 2.7574
30.07 40.60 1.8 2.9878
30.07 40.60 2.7 3.0794
30.07 40.60 3.6 3.1332
30.07 40.60 4.5 3.2191
30.07 40.60 5.4 3.3264
30.07 40.60 6.3 3.4246
30.07 40.60 7.2 3.5141
30.07 40.60 8.1 3.5642
30.07 40.65 0.0 1.3396
30.07 40.65 0.9 2.3854
30.07 40.65 1.8 2.7752
30.07 40.65 2.7 2.8844
30.07 40.65 3.6 2.9545
30.07 40.65 4.5 3.0457
30.07 40.65 5.4 3.188
30.07 40.65 6.3 3.3811
30.07 40.65 7.2 3.5554
30.07 40.65 8.1 3.6701
30.07 40.71 0.0 1.2998
30.07 40.71 0.9 1.9767
30.07 40.71 1.8 2.4251
30.07 40.71 2.7 2.5698
30.07 40.71 3.6 2.6832
30.07 40.71 4.5 2.8666
30.07 40.71 5.4 3.14
30.07 40.71 6.3 3.3839
30.07 40.71 7.2 3.5479
30.07 40.71 8.1 3.6024
30.07 40.77 0.0 1.4651
30.07 40.77 0.9 2.0843
30.07 40.77 1.8 2.7037
30.07 40.77 2.7 2.9804
30.07 40.77 3.6 3.0669
30.07 40.77 4.5 3.1143
30.07 40.77 5.4 3.1929
30.07 40.77 6.3 3.2925
30.07 40.77 7.2 3.4132
30.07 40.77 8.1 3.5046
30.07 40.82 0.0 1.6466
30.07 40.82 0.9 2.3584
30.07 40.82 1.8 2.5613
30.07 40.82 2.7 2.9828
30.07 40.82 3.6 3.114
30.07 40.82 4.5 3.2159
30.07 40.82 5.4 3.3785
30.07 40.82 6.3 3.4817
30.07 40.82 7.2 3.5357
30.07 40.82 8.1 3.5806
30.07 40.88 0.0 1.4236
30.07 40.88 0.9 2.5095
30.07 40.88 1.8 2.7201
30.07 40.88 2.7 2.9326
30.07 40.88 3.6 3.0975
30.07 40.88 4.5 3.2343
30.07 40.88 5.4 3.3727
30.07 40.88 6.3 3.4721
30.07 40.88 7.2 3.5624
30.07 40.88 8.1 3.6237
30.13 40.32 0.0 1.5509
30.13 40.32 0.9 2.4673
30.13 40.32 1.8 2.9452
30.13 40.32 2.7 3.0614
30.13 40.32 3.6 3.1083
30.13 40.32 4.5 3.1366
30.13 40.32 5.4 3.1763
30.13 40.32 6.3 3.2475
30.13 40.32 7.2 3.3598
30.13 40.32 8.1 3.4629
30.13 40.37 0.0 1.3956
30.13 40.37 0.9 2.4481
30.13 40.37 1.8 2.8648
30.13 40.37 2.7 2.9111
30.13 40.37 3.6 2.949
30.13 40.37 4.5 3.0084
30.13 40.37 5.4 3.0995
30.13 40.37 6.3 3.2922
30.13 40.37 7.2 3.516
30.13 40.37 8.1 3.6508
30.13 40.43 0.0 1.3635
30.13 40.43 0.9 2.3088
30.13 40.43 1.8 2.5892
30.13 40.43 2.7 2.9914
30.13 40.43 3.6 3.1858
30.13 40.43 4.5 3.3016
30.13 40.43 5.4 3.4086
30.13 40.43 6.3 3.4968
30.13 40.43 7.2 3.5859
30.13 40.43 8.1 3.6556
30.13 40.49 0.0 1.7477
30.13 40.49 0.9 2.5978
30.13 40.49 1.8 3.0671
30.13 40.49 2.7 3.2544
30.13 40.49 3.6 3.3216
30.13 40.49 4.5 3.3601
30.13 40.49 5.4 3.3892
30.13 40.49 6.3 3.4196
30.13 40.49 7.2 3.4609
30.13 40.49 8.1 3.4827
30.13 40.54 0.0 1.7412
30.13 40.54 0.9 3.0524
30.13 40.54 1.8 3.2253
30.13 40.54 2.7 3.2888
30.13 40.54 3.6 3.3343
30.13 40.54 4.5 3.4114
30.13 40.54 5.4 3.47
30.13 40.54 6.3 3.5096
30.13 40.54 7.2 3.5204
30.13 40.54 8.1 3.5121
30.13 40.60 0.0 1.8091
30.13 40.60 0.9 2.8531
30.13 40.60 1.8 3.2663
30.13 40.60 2.7 3.4677
30.13 40.60 3.6 3.5393
30.13 40.60 4.5 3.5716
30.13 40.60 5.4 3.5843
30.13 40.60 6.3 3.588
30.13 40.60 7.2 3.5823
30.13 40.60 8.1 3.5775
30.13 40.65 0.0 1.3734
30.13 40.65 0.9 2.1758
30.13 40.65 1.8 2.8102
30.13 40.65 2.7 3.0625
30.13 40.65 3.6 3.1844
30.13 40.65 4.5 3.257
30.13 40.65 5.4 3.3397
30.13 40.65 6.3 3.4232
30.13 40.65 7.2 3.4973
30.13 40.65 8.1 3.5319
30.13 40.71 0.0 1.4998
30.13 40.71 0.9 1.8617
30.13 40.71 1.8 2.1977
30.13 40.71 2.7 2.4189
30.13 40.71 3.6 2.5674
30.13 40.71 4.5 2.7149
30.13 40.71 5.4 2.9019
30.13 40.71 6.3 3.1084
30.13 40.71 7.2 3.345
30.13 40.71 8.1 3.5417
30.13 40.77 0.0 1.5987
30.13 40.77 0.9 2.0009
30.13 40.77 1.8 2.3948
30.13 40.77 2.7 2.7338
30.13 40.77 3.6 2.9207
30.13 40.77 4.5 3.0368
30.13 40.77 5.4 3.1425
30.13 40.77 6.3 3.2587
30.13 40.77 7.2 3.4048
30.13 40.77 8.1 3.5114
30.13 40.82 0.0 1.3298
30.13 40.82 0.9 2.3487
30.13 40.82 1.8 2.4931
30.13 40.82 2.7 2.65
30.13 40.82 3.6 2.9094
30.13 40.82 4.5 3.2704
30.13 40.82 5.4 3.522
30.13 40.82 6.3 3.6543
30.13 40.82 7.2 3.7473
30.13 40.82 8.1 3.781
30.13 40.88 0.0 1.3658
30.13 40.88 0.9 2.5932
30.13 40.88 1.8 2.8967
30.13 40.88 2.7 3.0215
30.13 40.88 3.6 3.1082
30.13 40.88 4.5 3.2369
30.13 40.88 5.4 3.3768
30.13 40.88 6.3 3.4678
30.13 40.88 7.2 3.5697
30.13 40.88 8.1 3.6425
30.20 40.32 0.0 1.4428
30.20 40.32 0.9 2.9647
30.20 40.32 1.8 3.0338
30.20 40.32 2.7 3.0655
30.20 40.32 3.6 3.0998
30.20 40.32 4.5 3.2161
30.20 40.32 5.4 3.3542
30.20 40.32 6.3 3.4534
30.20 40.32 7.2 3.5237
30.20 40.32 8.1 3.5349
30.20 40.37 0.0 1.6638
30.20 40.37 0.9 2.8165
30.20 40.37 1.8 3.1211
30.20 40.37 2.7 3.1651
30.20 40.37 3.6 3.1805
30.20 40.37 4.5 3.1779
30.20 40.37 5.4 3.1772
30.20 40.37 6.3 3.198
30.20 40.37 7.2 3.2402
30.20 40.37 8.1 3.3135
30.20 40.43 0.0 1.5438
30.20 40.43 0.9 2.1816
30.20 40.43 1.8 2.8079
30.20 40.43 2.7 3.0013
30.20 40.43 3.6 3.0748
30.20 40.43 4.5 3.1391
30.20 40.43 5.4 3.2246
30.20 40.43 6.3 3.3412
30.20 40.43 7.2 3.4587
30.20 40.43 8.1 3.5471
30.20 40.49 0.0 1.5281
30.20 40.49 0.9 2.2523
30.20 40.49 1.8 2.4175
30.20 40.49 2.7 2.6111
30.20 40.49 3.6 2.8854
30.20 40.49 4.5 3.2401
30.20 40.49 5.4 3.4256
30.20 40.49 6.3 3.5719
30.20 40.49 7.2 3.6791
30.20 40.49 8.1 3.7369
30.20 40.54 0.0 2.2494
30.20 40.54 0.9 2.6304
30.20 40.54 1.8 3.0437
30.20 40.54 2.7 3.1928
30.20 40.54 3.6 3.2503
30.20 40.54 4.5 3.2775
30.20 40.54 5.4 3.3051
30.20 40.54 6.3 3.3132
30.20 40.54 7.2 3.3417
30.20 40.54 8.1 3.3906
30.20 40.60 0.0 1.7087
30.20 40.60 0.9 3.2855
30.20 40.60 1.8 3.5274
30.20 40.60 2.7 3.53
30.20 40.60 3.6 3.5144
30.20 40.60 4.5 3.4916
30.20 40.60 5.4 3.471
30.20 40.60 6.3 3.4623
30.20 40.60 7.2 3.4554
30.20 40.60 8.1 3.4397
30.20 40.65 0.0 1.4582
30.20 40.65 0.9 2.9833
30.20 40.65 1.8 2.9943
30.20 40.65 2.7 2.9794
30.20 40.65 3.6 2.9791
30.20 40.65 4.5 3.0626
30.20 40.65 5.4 3.2784
30.20 40.65 6.3 3.456
30.20 40.65 7.2 3.605
30.20 40.65 8.1 3.7047
30.20 40.71 0.0 1.2698
30.20 40.71 0.9 3.1909
30.20 40.71 1.8 3.1815
30.20 40.71 2.7 3.1631
30.20 40.71 3.6 3.1361
30.20 40.71 4.5 3.1201
30.20 40.71 5.4 3.115
30.20 40.71 6.3 3.1404
30.20 40.71 7.2 3.2164
30.20 40.71 8.1 3.3127
30.20 40.77 0.0 1.0398
30.20 40.77 0.9 1.7797
30.20 40.77 1.8 2.255
30.20 40.77 2.7 2.8087
30.20 40.77 3.6 3.0321
30.20 40.77 4.5 3.2055
30.20 40.77 5.4 3.3592
30.20 40.77 6.3 3.5133
30.20 40.77 7.2 3.6677
30.20 40.77 8.1 3.7626
30.20 40.82 0.0 1.3814
30.20 40.82 0.9 2.0133
30.20 40.82 1.8 2.2052
30.20 40.82 2.7 2.3945
30.20 40.82 3.6 2.7039
30.20 40.82 4.5 3.2637
30.20 40.82 5.4 3.614
30.20 40.82 6.3 3.7851
30.20 40.82 7.2 3.8967
30.20 40.82 8.1 3.9394
30.20 40.88 0.0 1.659
30.20 40.88 0.9 2.4786
30.20 40.88 1.8 3.2444
30.20 40.88 2.7 3.4452
30.20 40.88 3.6 3.4945
30.20 40.88 4.5 3.5241
30.20 40.88 5.4 3.5448
30.20 40.88 6.3 3.5569
30.20 40.88 7.2 3.5704
30.20 40.88 8.1 3.5755
30.26 40.32 0.0 1.8869
30.26 40.32 0.9 2.7773
30.26 40.32 1.8 2.8976
30.26 40.32 2.7 3.0166
30.26 40.32 3.6 3.1765
30.26 40.32 4.5 3.3074
30.26 40.32 5.4 3.3994
30.26 40.32 6.3 3.4722
30.26 40.32 7.2 3.5058
30.26 40.32 8.1 3.5203
30.26 40.37 0.0 1.7599
30.26 40.37 0.9 3.2696
30.26 40.37 1.8 3.4432
30.26 40.37 2.7 3.4374
30.26 40.37 3.6 3.4141
30.26 40.37 4.5 3.393
30.26 40.37 5.4 3.3639
30.26 40.37 6.3 3.3467
30.26 40.37 7.2 3.3311
30.26 40.37 8.1 3.3067
30.26 40.43 0.0 1.7174
30.26 40.43 0.9 2.5592
30.26 40.43 1.8 3.0409
30.26 40.43 2.7 3.1293
30.26 40.43 3.6 3.1574
30.26 40.43 4.5 3.1766
30.26 40.43 5.4 3.2068
30.26 40.43 6.3 3.2384
30.26 40.43 7.2 3.3009
30.26 40.43 8.1 3.3642
30.26 40.49 0.0 1.2954
30.26 40.49 0.9 1.7669
30.26 40.49 1.8 2.661
30.26 40.49 2.7 3.0428
30.26 40.49 3.6 3.1741
30.26 40.49 4.5 3.2754
30.26 40.49 5.4 3.377
30.26 40.49 6.3 3.499
30.26 40.49 7.2 3.6215
30.26 40.49 8.1 3.7143
30.26 40.54 0.0 1.4752
30.26 40.54 0.9 2.0861
30.26 40.54 1.8 2.9355
30.26 40.54 2.7 3.2228
30.26 40.54 3.6 3.3303
30.26 40.54 4.5 3.4087
30.26 40.54 5.4 3.4881
30.26 40.54 6.3 3.5685
30.26 40.54 7.2 3.6499
30.26 40.54 8.1 3.6821
30.26 40.60 0.0 1.7678
30.26 40.60 0.9 2.9977
30.26 40.60 1.8 3.5689
30.26 40.60 2.7 3.6583
30.26 40.60 3.6 3.6576
30.26 40.60 4.5 3.6276
30.26 40.60 5.4 3.5988
30.26 40.60 6.3 3.5717
30.26 40.60 7.2 3.5461
30.26 40.60 8.1 3.512
30.26 40.65 0.0 1.383
30.26 40.65 0.9 1.7753
30.26 40.65 1.8 2.4703
30.26 40.65 2.7 2.85
30.26 40.65 3.6 2.9971
30.26 40.65 4.5 3.1228
30.26 40.65 5.4 3.2685
30.26 40.65 6.3 3.3843
30.26 40.65 7.2 3.5208
30.26 40.65 8.1 3.6278
30.26 40.71 0.0 1.4083
30.26 40.71 0.9 2.0846
30.26 40.71 1.8 2.6534
30.26 40.71 2.7 2.8391
30.26 40.71 3.6 2.9442
30.26 40.71 4.5 3.0297
30.26 40.71 5.4 3.1259
30.26 40.71 6.3 3.2429
30.26 40.71 7.2 3.3907
30.26 40.71 8.1 3.4989
30.26 40.77 0.0 1.0901
30.26 40.77 0.9 2.4519
30.26 40.77 1.8 2.7914
30.26 40.77 2.7 2.9209
30.26 40.77 3.6 3.0006
30.26 40.77 4.5 3.0912
30.26 40.77 5.4 3.212
30.26 40.77 6.3 3.3832
30.26 40.77 7.2 3.5347
30.26 40.77 8.1 3.6566
30.26 40.82 0.0 1.4293
30.26 40.82 0.9 2.2683
30.26 40.82 1.8 2.3422
30.26 40.82 2.7 2.4067
30.26 40.82 3.6 2.6218
30.26 40.82 4.5 3.2271
30.26 40.82 5.4 3.5428
30.26 40.82 6.3 3.7488
30.26 40.82 7.2 3.8757
30.26 40.82 8.1 3.9137
30.26 40.88 0.0 1.8585
30.26 40.88 0.9 2.7961
30.26 40.88 1.8 3.1128
30.26 40.88 2.7 3.2775
30.26 40.88 3.6 3.3526
30.26 40.88 4.5 3.3887
30.26 40.88 5.4 3.4159
30.26 40.88 6.3 3.4444
30.26 40.88 7.2 3.5039
30.26 40.88 8.1 3.5443
30.33 40.32 0.0 1.9737
30.33 40.32 0.9 2.5871
30.33 40.32 1.8 2.8511
30.33 40.32 2.7 3.0417
30.33 40.32 3.6 3.2214
30.33 40.32 4.5 3.3512
30.33 40.32 5.4 3.4312
30.33 40.32 6.3 3.4815
30.33 40.32 7.2 3.5224
30.33 40.32 8.1 3.5338
30.33 40.37 0.0 1.7285
30.33 40.37 0.9 2.5734
30.33 40.37 1.8 2.9981
30.33 40.37 2.7 3.2596
30.33 40.37 3.6 3.4304
30.33 40.37 4.5 3.4912
30.33 40.37 5.4 3.5226
30.33 40.37 6.3 3.5446
30.33 40.37 7.2 3.5572
30.33 40.37 8.1 3.5407
30.33 40.43 0.0 1.4602
30.33 40.43 0.9 2.5006
30.33 40.43 1.8 2.6936
30.33 40.43 2.7 2.8179
30.33 40.43 3.6 2.9348
30.33 40.43 4.5 3.1635
30.33 40.43 5.4 3.4037
30.33 40.43 6.3 3.5651
30.33 40.43 7.2 3.6874
30.33 40.43 8.1 3.7606
30.33 40.49 0.0 1.4187
30.33 40.49 0.9 3.069
30.33 40.49 1.8 3.1175
30.33 40.49 2.7 3.148
30.33 40.49 3.6 3.1909
30.33 40.49 4.5 3.2658
30.33 40.49 5.4 3.3622
30.33 40.49 6.3 3.4797
30.33 40.49 7.2 3.5981
30.33 40.49 8.1 3.6574
30.33 40.54 0.0 2.2874
30.33 40.54 0.9 3.0427
30.33 40.54 1.8 3.0956
30.33 40.54 2.7 3.0954
30.33 40.54 3.6 3.0969
30.33 40.54 4.5 3.1012
30.33 40.54 5.4 3.1279
30.33 40.54 6.3 3.1664
30.33 40.54 7.2 3.2763
30.33 40.54 8.1 3.4775
30.33 40.60 0.0 1.6499
30.33 40.60 0.9 3.0462
30.33 40.60 1.8 3.0939
30.33 40.60 2.7 3.1036
30.33 40.60 3.6 3.1173
30.33 40.60 4.5 3.1839
30.33 40.60 5.4 3.313
30.33 40.60 6.3 3.4237
30.33 40.60 7.2 3.4957
30.33 40.60 8.1 3.5289
30.33 40.65 0.0 1.3573
30.33 40.65 0.9 1.8638
30.33 40.65 1.8 2.5724
30.33 40.65 2.7 3.0079
30.33 40.65 3.6 3.1327
30.33 40.65 4.5 3.2379
30.33 40.65 5.4 3.3137
30.33 40.65 6.3 3.4104
30.33 40.65 7.2 3.5081
30.33 40.65 8.1 3.5863
30.33 40.71 0.0 1.6165
30.33 40.71 0.9 2.7515
30.33 40.71 1.8 2.7512
30.33 40.71 2.7 2.737
30.33 40.71 3.6 2.7885
30.33 40.71 4.5 3.0637
30.33 40.71 5.4 3.4215
30.33 40.71 6.3 3.6804
30.33 40.71 7.2 3.8106
30.33 40.71 8.1 3.8518
30.33 40.77 0.0 1.42
30.33 40.77 0.9 2.3979
30.33 40.77 1.8 2.4612
30.33 40.77 2.7 2.5869
30.33 40.77 3.6 2.8054
30.33 40.77 4.5 3.216
30.33 40.77 5.4 3.4477
30.33 40.77 6.3 3.6407
30.33 40.77 7.2 3.7848
30.33 40.77 8.1 3.8396
30.33 40.82 0.0 1.4549
30.33 40.82 0.9 2.9412
30.33 40.82 1.8 2.9928
30.33 40.82 2.7 2.996
30.33 40.82 3.6 3.0226
30.33 40.82 4.5 3.1517
30.33 40.82 5.4 3.3723
30.33 40.82 6.3 3.5341
30.33 40.82 7.2 3.6771
30.33 40.82 8.1 3.7711
30.33 40.88 0.0 1.7908
30.33 40.88 0.9 3.1447
30.33 40.88 1.8 3.5393
30.33 40.88 2.7 3.592
30.33 40.88 3.6 3.5853
30.33 40.88 4.5 3.5608
30.33 40.88 5.4 3.5389
30.33 40.88 6.3 3.5194
30.33 40.88 7.2 3.5119
30.33 40.88 8.1 3.4964
30.39 40.32 0.0 1.6666
30.39 40.32 0.9 2.4748
30.39 40.32 1.8 2.9826
30.39 40.32 2.7 3.2677
30.39 40.32 3.6 3.3132
30.39 40.32 4.5 3.3294
30.39 40.32 5.4 3.3467
30.39 40.32 6.3 3.3652
30.39 40.32 7.2 3.4048
30.39 40.32 8.1 3.4252
30.39 40.37 0.0 1.5024
30.39 40.37 0.9 2.6261
30.39 40.37 1.8 3.2446
30.39 40.37 2.7 3.3433
30.39 40.37 3.6 3.3436
30.39 40.37 4.5 3.3454
30.39 40.37 5.4 3.3389
30.39 40.37 6.3 3.3337
30.39 40.37 7.2 3.3398
30.39 40.37 8.1 3.337
30.39 40.43 0.0 1.4763
30.39 40.43 0.9 2.7229
30.39 40.43 1.8 2.7959
30.39 40.43 2.7 2.8518
30.39 40.43 3.6 3.0308
30.39 40.43 4.5 3.262
30.39 40.43 5.4 3.3947
30.39 40.43 6.3 3.4686
30.39 40.43 7.2 3.5235
30.39 40.43 8.1 3.5292
30.39 40.49 0.0 1.4657
30.39 40.49 0.9 2.5707
30.39 40.49 1.8 2.7509
30.39 40.49 2.7 2.8023
30.39 40.49 3.6 2.8856
30.39 40.49 4.5 3.1003
30.39 40.49 5.4 3.3262
30.39 40.49 6.3 3.4326
30.39 40.49 7.2 3.4998
30.39 40.49 8.1 3.5076
30.39 40.54 0.0 1.8352
30.39 40.54 0.9 2.7786
30.39 40.54 1.8 2.9425
30.39 40.54 2.7 3.0151
30.39 40.54 3.6 3.0985
30.39 40.54 4.5 3.273
30.39 40.54 5.4 3.3783
30.39 40.54 6.3 3.4345
30.39 40.54 7.2 3.4712
30.39 40.54 8.1 3.4787
30.39 40.60 0.0 1.5727
30.39 40.60 0.9 2.7874
30.39 40.60 1.8 2.826
30.39 40.60 2.7 2.8782
30.39 40.60 3.6 3.1148
30.39 40.60 4.5 3.4142
30.39 40.60 5.4 3.5754
30.39 40.60 6.3 3.6684
30.39 40.60 7.2 3.7125
30.39 40.60 8.1 3.7178
30.39 40.65 0.0 1.4048
30.39 40.65 0.9 2.107
30.39 40.65 1.8 2.8094
30.39 40.65 2.7 3.0293
30.39 40.65 3.6 3.1291
30.39 40.65 4.5 3.1899
30.39 40.65 5.4 3.2515
30.39 40.65 6.3 3.3242
30.39 40.65 7.2 3.4076
30.39 40.65 8.1 3.4716
30.39 40.71 0.0 1.5011
30.39 40.71 0.9 2.2651
30.39 40.71 1.8 2.8919
30.39 40.71 2.7 3.0167
30.39 40.71 3.6 3.0622
30.39 40.71 4.5 3.0994
30.39 40.71 5.4 3.1482
30.39 40.71 6.3 3.2088
30.39 40.71 7.2 3.3209
30.39 40.71 8.1 3.4038
30.39 40.77 0.0 1.2783
30.39 40.77 0.9 1.7409
30.39 40.77 1.8 1.8395
30.39 40.77 2.7 2.0378
30.39 40.77 3.6 2.7658
30.39 40.77 4.5 3.3537
30.39 40.77 5.4 3.6317
30.39 40.77 6.3 3.8199
30.39 40.77 7.2 3.9482
30.39 40.77 8.1 4.0072
30.39 40.82 0.0 1.5469
30.39 40.82 0.9 2.267
30.39 40.82 1.8 2.5589
30.39 40.82 2.7 2.8091
30.39 40.82 3.6 3.0591
30.39 40.82 4.5 3.2893
30.39 40.82 5.4 3.4699
30.39 40.82 6.3 3.6209
30.39 40.82 7.2 3.7324
30.39 40.82 8.1 3.7843
30.39 40.88 0.0 1.6565
30.39 40.88 0.9 2.787
30.39 40.88 1.8 3.2506
30.39 40.88 2.7 3.3835
30.39 40.88 3.6 3.4476
30.39 40.88 4.5 3.4727
30.39 40.88 5.4 3.4892
30.39 40.88 6.3 3.5068
30.39 40.88 7.2 3.5254
30.39 40.88 8.1 3.515
30.46 40.32 0.0 1.6226
30.46 40.32 0.9 2.375
30.46 40.32 1.8 2.8955
30.46 40.32 2.7 3.0129
30.46 40.32 3.6 3.0707
30.46 40.32 4.5 3.1201
30.46 40.32 5.4 3.171
30.46 40.32 6.3 3.2632
30.46 40.32 7.2 3.3567
30.46 40.32 8.1 3.4409
30.46 40.37 0.0 1.6304
30.46 40.37 0.9 2.812
30.46 40.37 1.8 3.1668
30.46 40.37 2.7 3.2314
30.46 40.37 3.6 3.2373
30.46 40.37 4.5 3.2349
30.46 40.37 5.4 3.2343
30.46 40.37 6.3 3.2352
30.46 40.37 7.2 3.2473
30.46 40.37 8.1 3.2406
30.46 40.43 0.0 1.5432
30.46 40.43 0.9 2.746
30.46 40.43 1.8 2.8033
30.46 40.43 2.7 2.8235
30.46 40.43 3.6 2.8565
30.46 40.43 4.5 2.9817
30.46 40.43 5.4 3.1684
30.46 40.43 6.3 3.326
30.46 40.43 7.2 3.4447
30.46 40.43 8.1 3.4844
30.46 40.49 0.0 1.3578
30.46 40.49 0.9 2.3026
30.46 40.49 1.8 2.9185
30.46 40.49 2.7 3.0413
30.46 40.49 3.6 3.0938
30.46 40.49 4.5 3.1467
30.46 40.49 5.4 3.2307
30.46 40.49 6.3 3.3356
30.46 40.49 7.2 3.4614
30.46 40.49 8.1 3.5281
30.46 40.54 0.0 1.7235
30.46 40.54 0.9 2.4025
30.46 40.54 1.8 3.0779
30.46 40.54 2.7 3.3984
30.46 40.54 3.6 3.5075
30.46 40.54 4.5 3.5563
30.46 40.54 5.4 3.5758
30.46 40.54 6.3 3.5962
30.46 40.54 7.2 3.6074
30.46 40.54 8.1 3.5999
30.46 40.60 0.0 1.4885
30.46 40.60 0.9 2.6665
30.46 40.60 1.8 2.7709
30.46 40.60 2.7 2.8788
30.46 40.60 3.6 3.0898
30.46 40.60 4.5 3.3529
30.46 40.60 5.4 3.5275
30.46 40.60 6.3 3.6531
30.46 40.60 7.2 3.7095
30.46 40.60 8.1 3.717
30.46 40.65 0.0 1.2211
30.46 40.65 0.9 1.5024
30.46 40.65 1.8 2.1373
30.46 40.65 2.7 2.6978
30.46 40.65 3.6 2.8964
30.46 40.65 4.5 3.0141
30.46 40.65 5.4 3.1317
30.46 40.65 6.3 3.2798
30.46 40.65 7.2 3.4682
30.46 40.65 8.1 3.637
30.46 40.71 0.0 1.2451
30.46 40.71 0.9 1.5599
30.46 40.71 1.8 1.8215
30.46 40.71 2.7 2.5692
30.46 40.71 3.6 2.8946
30.46 40.71 4.5 3.0688
30.46 40.71 5.4 3.2022
30.46 40.71 6.3 3.3157
30.46 40.71 7.2 3.4292
30.46 40.71 8.1 3.5429
30.46 40.77 0.0 1.3547
30.46 40.77 0.9 2.0639
30.46 40.77 1.8 2.1599
30.46 40.77 2.7 2.6192
30.46 40.77 3.6 2.97
30.46 40.77 4.5 3.1614
30.46 40.77 5.4 3.3435
30.46 40.77 6.3 3.4958
30.46 40.77 7.2 3.6587
30.46 40.77 8.1 3.7621
30.46 40.82 0.0 1.4884
30.46 40.82 0.9 2.0813
30.46 40.82 1.8 2.675
30.46 40.82 2.7 2.9468
30.46 40.82 3.6 3.0888
30.46 40.82 4.5 3.2016
30.46 40.82 5.4 3.315
30.46 40.82 6.3 3.4494
30.46 40.82 7.2 3.5944
30.46 40.82 8.1 3.6901
30.46 40.88 0.0 1.4608
30.46 40.88 0.9 2.0656
30.46 40.88 1.8 2.625
30.46 40.88 2.7 2.9312
30.46 40.88 3.6 3.0961
30.46 40.88 4.5 3.1908
30.46 40.88 5.4 3.2753
30.46 40.88 6.3 3.3602
30.46 40.88 7.2 3.4856
30.46 40.88 8.1 3.5712
